# Supplementary material for: Disturbed intramitochondrial phosphatidic acid transport impairs cellular stress signaling
Source: PubMed Central journal article supplement (PMC7949116; doi:10.1016/j.jbc.2021.100335), 2021-01-23
Supplement: mmc1.pdf [file mmc1.pdf]

Supporting information

**Disturbed intramitochondrial phosphatidic acid transport impairs cellular stress signaling**

Akinori Eiyama<sup>1</sup>, Mari J Aaltonen<sup>2,†</sup>, Hendrik Nolte<sup>1</sup>, Takashi Tatsuta<sup>1</sup> and Thomas Langer<sup>1,2,\*</sup>

<sup>1</sup>Max-Planck-Institute for Biology of Ageing, Cologne, Germany

<sup>2</sup>Cologne Excellence Cluster on Cellular Stress Responses in Aging-Associated Diseases (CECAD),

University of Cologne, Cologne, Germany

<sup>†</sup>Present address: Montreal Neurological Institute, McGill University, Montreal, QC, Canada

\*Corresponding author: Thomas Langer

Email: [TLanger@age.mpg.de](mailto:TLanger@age.mpg.de)

## Figure legends

### Figure S1. Phospholipidome of *ups1Δ* and wild-type (WT) cells

(A) Scatter plot of whole cell phospholipidome in *ups1Δ* cells against wild-type (WT) cells. Dashed line represents  $p = 0.05$ , the colors of circles represent lipid class, and the areas of circles are proportional to the relative abundance of individual lipid species in WT.

(B) Scatter plot of ER-enriched microsome phospholipidome in *ups1Δ* cells against WT cells. Dashed line represents  $p = 0.05$ , the colors of circles represent lipid class, and the areas of circles are proportional to the relative abundance of individual lipid species in WT.

(C) WT and *ups1Δ* cells expressing *4xUPRE-GFP* grown to log phase in SCGal medium were subjected to western blotting. Pgk1 and ponceau staining were monitored as a loading control.

(D) GFP in (C) was quantified. GFP signals were normalized to Pgk1 and expressed relative to WT cells (set as one). Data represent mean  $\pm$  SD (n = 3).

(E) WT, *tam41Δ* and *pgs1Δ* cells expressing *4xUPRE-GFP* grown to log phase in SCD medium were subjected to western blotting. Pgk1 and ponceau staining were monitored as a loading control.

(F) GFP in (E) was quantified. GFP signals were normalized to Pgk1 and expressed relative to WT cells (set as one). Data represent mean  $\pm$  SD (n = 3).

(G) WT, *ups1Δ* and *crd1Δ* cells expressing *4xUPRE-GFP* grown to log phase in SCD medium were subjected to western blotting.

(H) GFP in (G) was quantified. GFP signals were normalized to Pgk1 and expressed relative to WT cells (set as one). Data represent mean  $\pm$  SD (n = 3).

### Figure S2. RNA-seq data suggest suppression of the UPR and induction of autophagy in *ups1Δ* cells

(A) Bar graph of relative abundance of canonical UPR regulated genes in *ups1Δ* cells against wild-type (WT) cells. Total RNA was extracted from WT and *ups1Δ* cells grown to log phase in SCD medium. RNA samples were subjected to RNA-seq analysis. (n = 3).  $^{**}P < 0.01$ .

(B) Bar graph of relative abundance of significantly changed core *ATG* genes in *ups1Δ* cells against WT cells.  $^{**}P < 0.01$ .

(C) Scatter plot of gene abundance in WT+tunicamycin/WT against *ups1Δ*+tunicamycin/*ups1Δ*. Genes changed significantly ( $P < 0.05$ ) by treatment with tunicamycin in WT and *ups1Δ* cells are plotted. Orange highlight indicates genes involved in ribosome biogenesis (RiBi genes).

### Figure S3. Alterations in the phospholipid composition of cell membranes do not significantly affect TORC1-Sch9 signaling

(A) Cardiolipin (CL) levels of wild-type (WT) and *crd1Δ* cells grown to log phase in SCD medium. Data represent mean  $\pm$  SD (n = 3).

(B) WT, *ups1Δ*, *ups2Δ* and *crd1Δ* cells expressing Sch9-6HA were grown to log phase in SCD medium. For the analysis of Sch9 phosphorylation, lysates were treated with NTCB and subjected to western blotting.

(C) Phosphorylated Sch9-6HA ratio in (B) was quantified. Phosphorylated Sch9-6HA signals were divided with total Sch9-6HA signals. Data represent mean  $\pm$  SD (n = 3).  $^{*}P < 0.05$ . N.S., not significant.

(D) WT cells expressing Sch9-6HA were grown to log phase in SCD medium with or without 1 mM choline. For the analysis of Sch9 phosphorylation, lysates were treated with NTCB and subjected to western blotting.

(E) Phosphorylated Sch9-6HA ratio in (D) was quantified as described in (F). Data represent mean  $\pm$  SD (n = 3). N.S., not significant.

(F) WT, *nem1* $\Delta$ , and *spo7* $\Delta$  cells expressing Sch9-6HA were grown to log phase in SCD medium. For the analysis of Sch9 phosphorylation, lysates were treated with NTCB and subjected to western blotting.

(G) Phosphorylated Sch9-6HA ratio in (F) was quantified. Phosphorylated Sch9-6HA signals were divided with total Sch9-6HA signals. Data represent mean  $\pm$  SD (n = 3). N.S., not significant.

Fig. S1

A

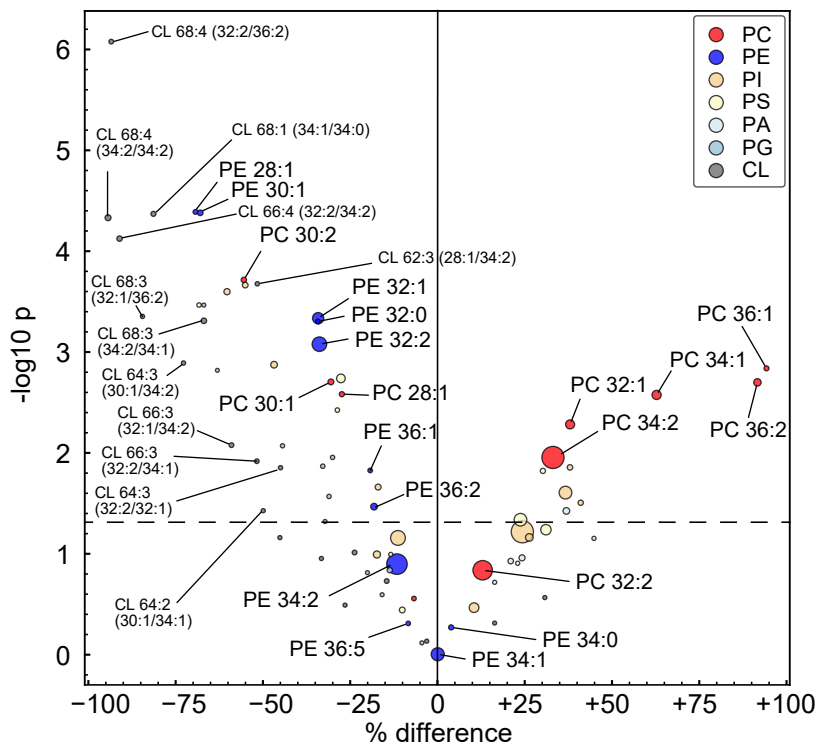

B

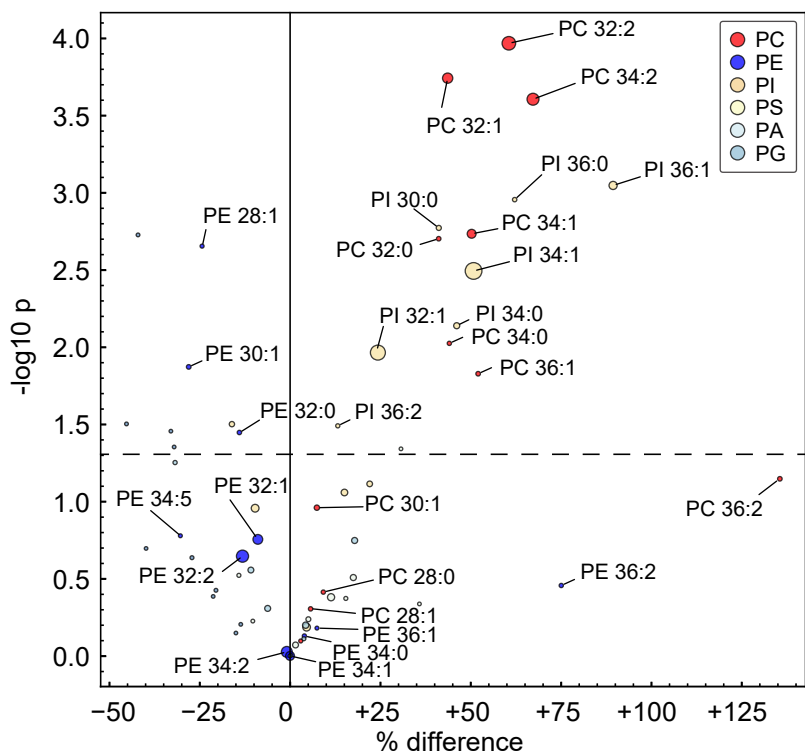

C

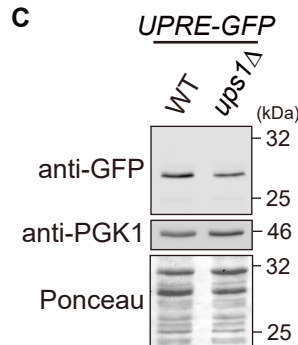

D

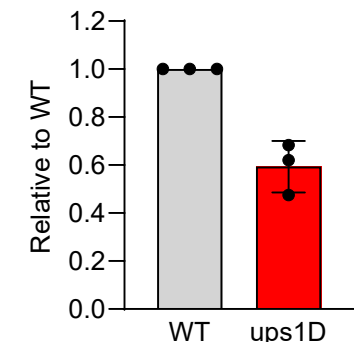

E

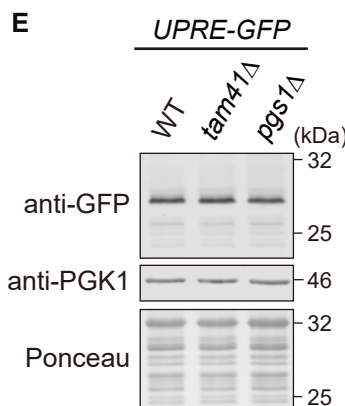

F

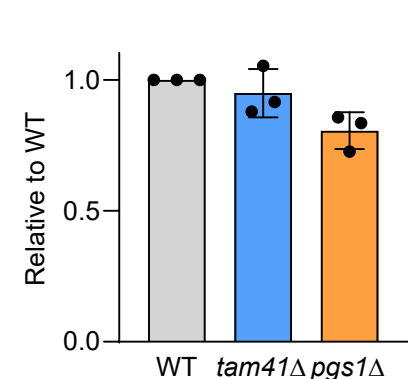

G

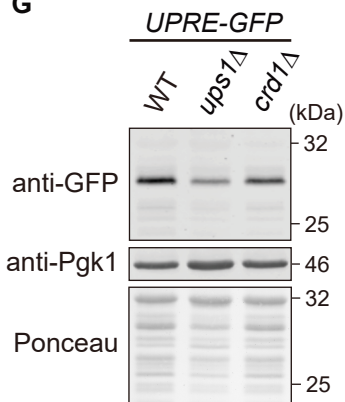

H

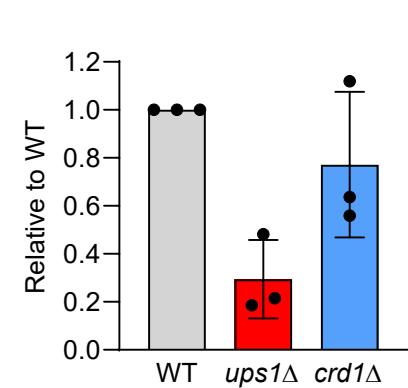

Fig. S2

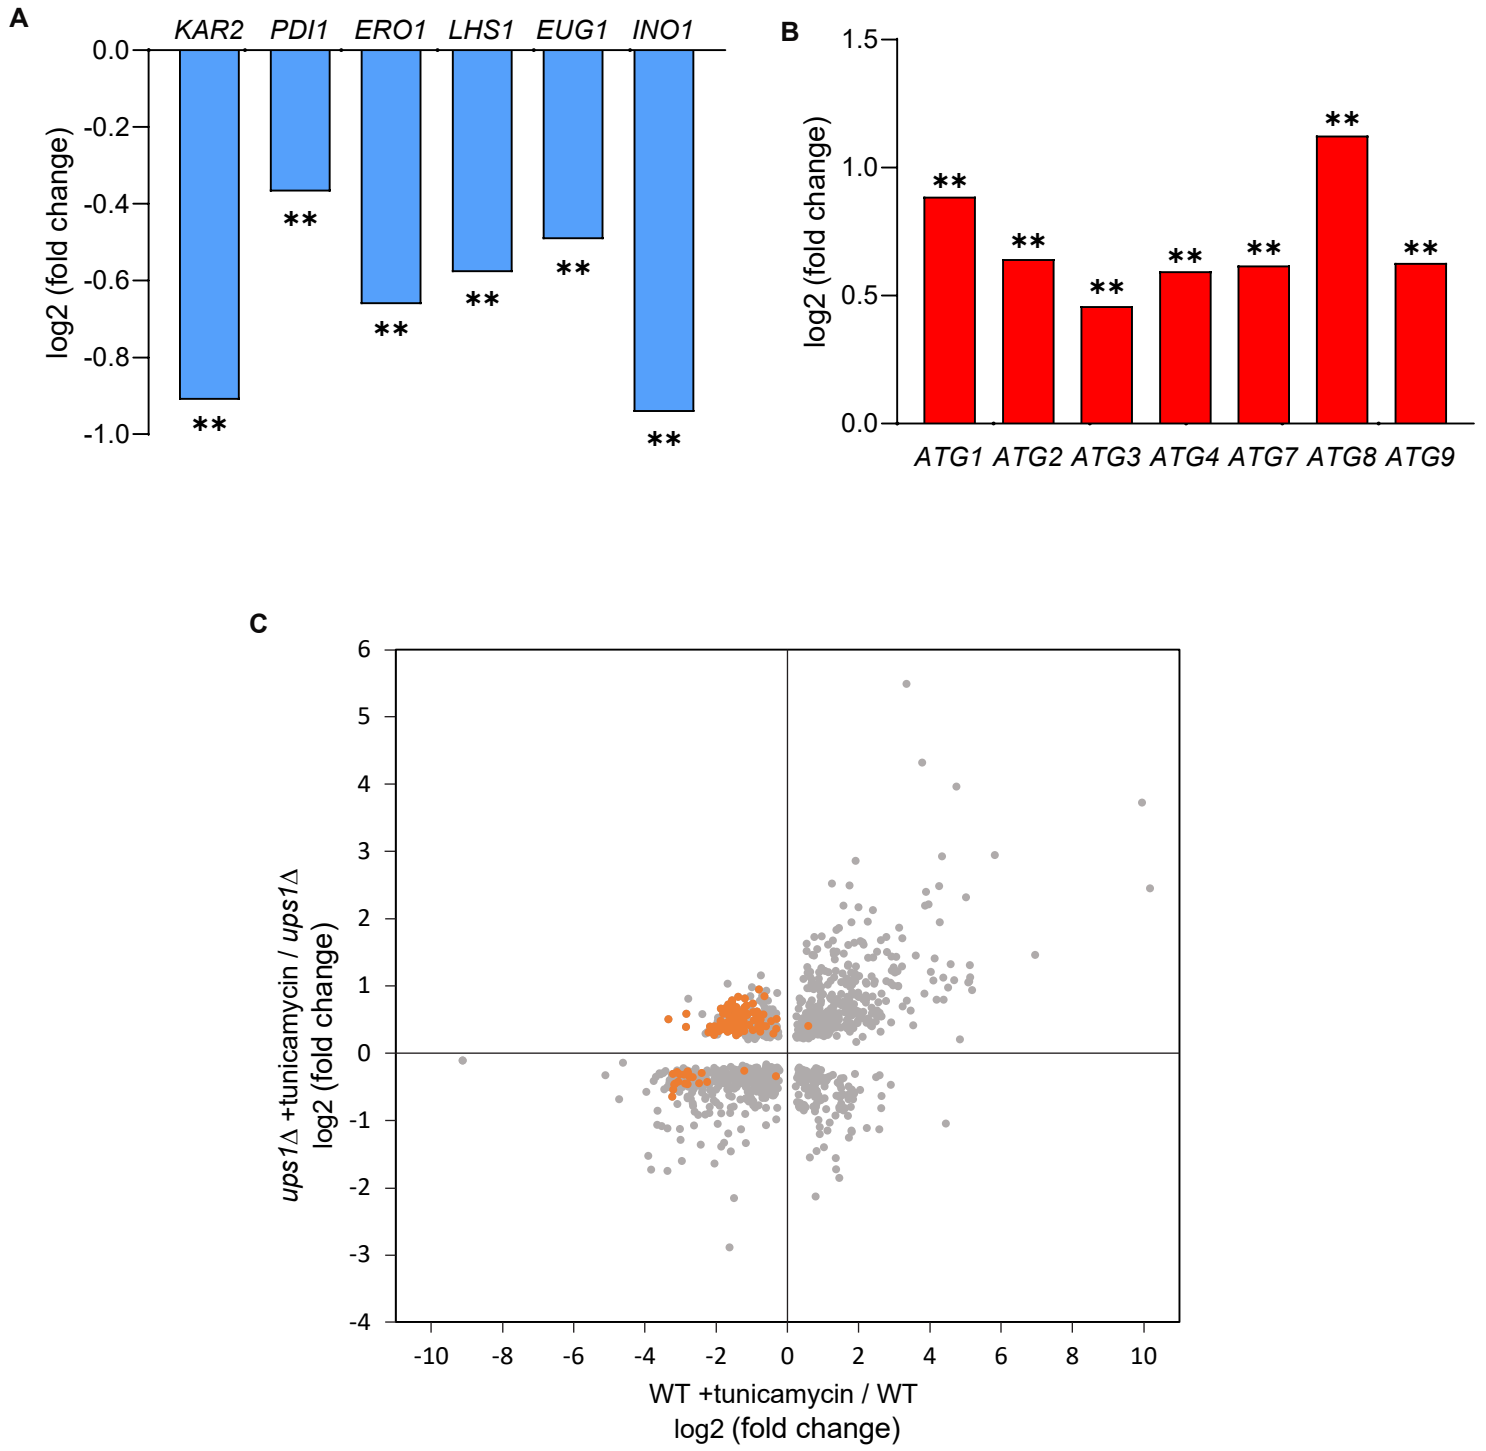

Fig. S3

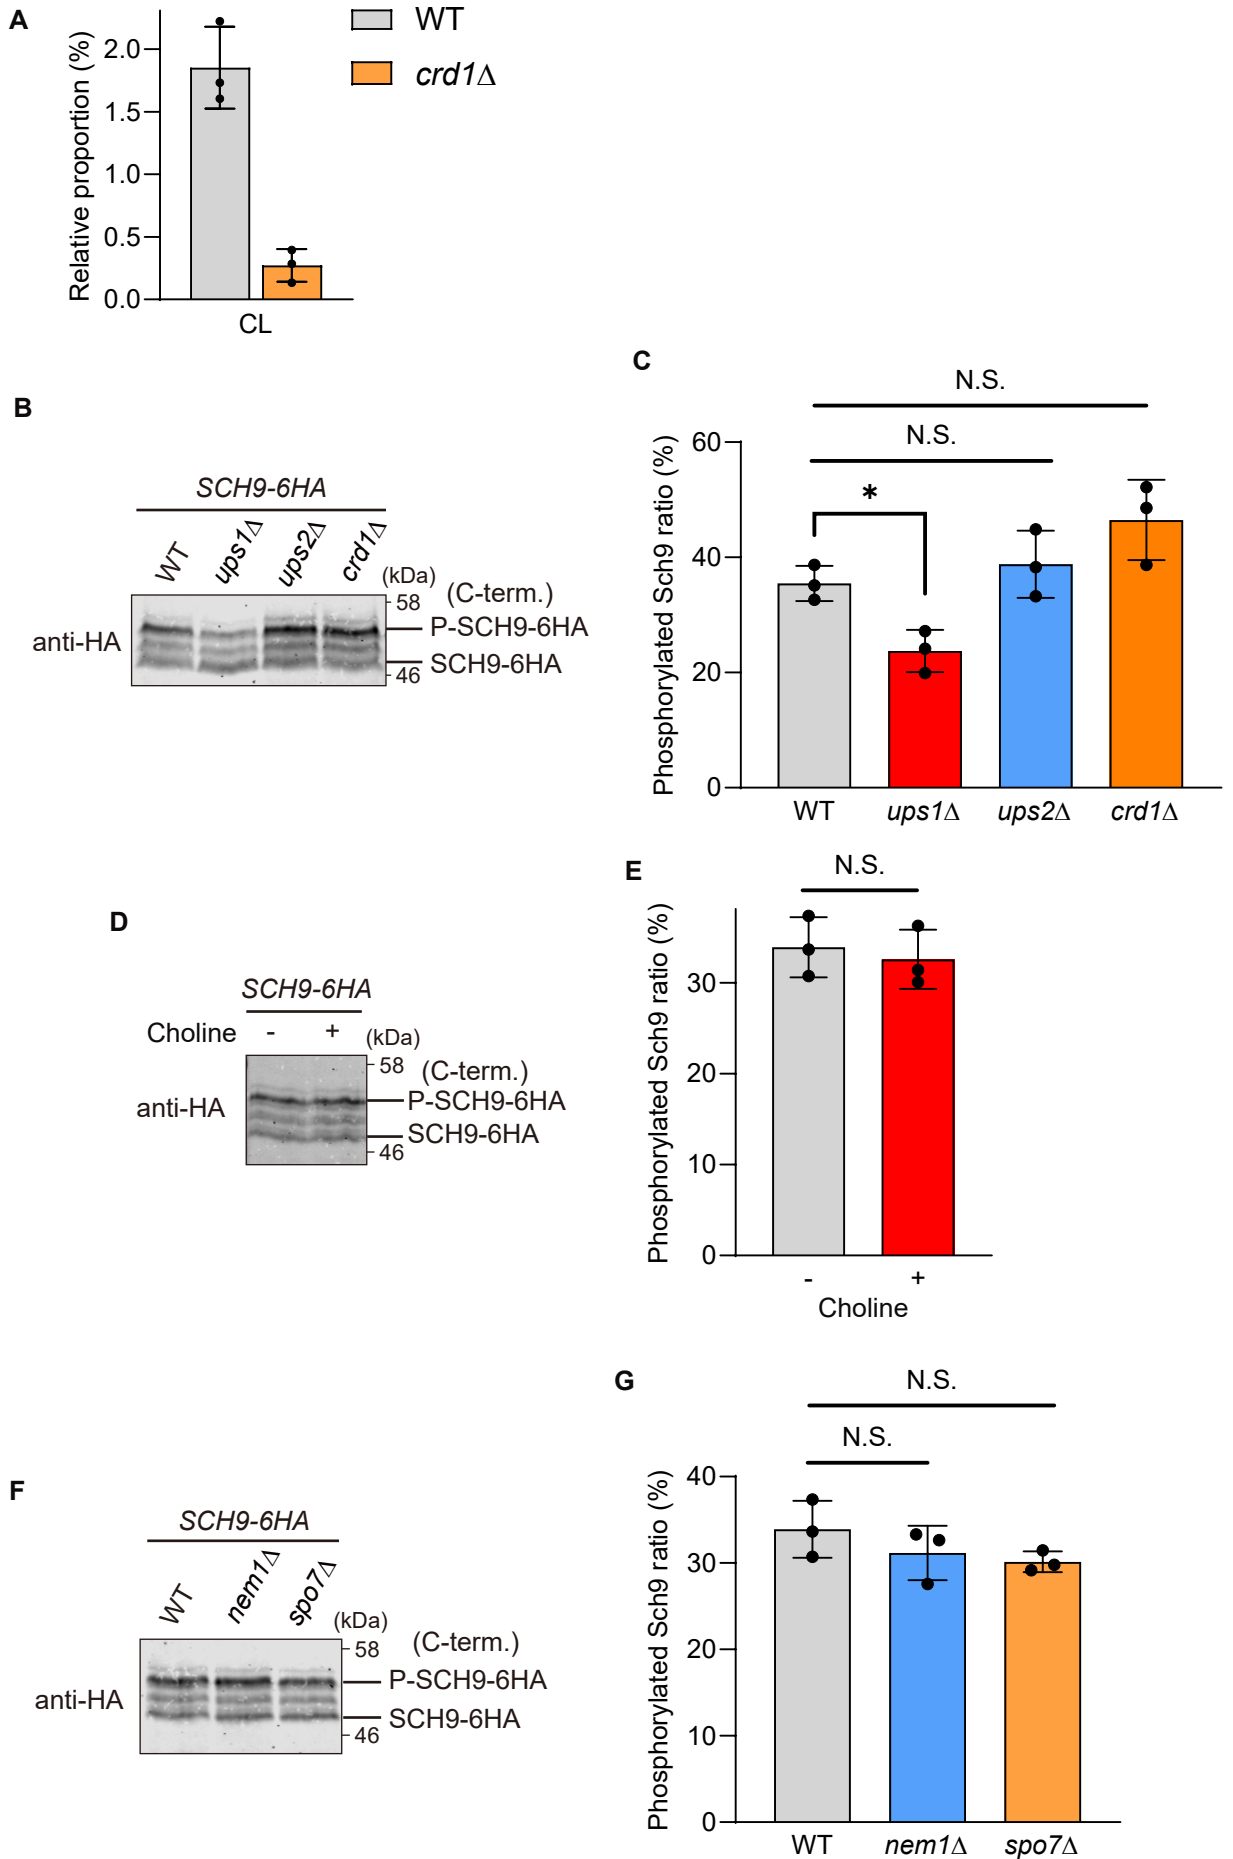

Table S1. RNA-seq data.

Table S2. Proteomics data.

Table S3. RNA-seq GO term DAVID.

Table S4. Proteomics 1D enrichment.

Table S5. Strain list

| strain name | strain description                             | background | Mating type | genotype                                                                                                 | source                |
|-------------|------------------------------------------------|------------|-------------|----------------------------------------------------------------------------------------------------------|-----------------------|
| CG214       | wild-type                                      | S288c      | a           | <i>his3Δ1leu2Δ0 met15Δ0 lys2Δ0 ura3Δ0</i>                                                                | Osman et al., 2009    |
| PD49        | <i>ups1Δ</i>                                   | S288c      | α           | <i>his3Δ1leu2Δ0 ura3Δ0 ups1Δ::hphNT1</i>                                                                 | Osman et al., 2009    |
| MA318       | <i>UPRE-GFP-URA3</i>                           | W303       | a           | <i>ade2Δ1 leu2Δ3 his3Δ11, 15 trp1Δ1 ura3Δ1 can1Δ100 ura3Δ::4xUPRE-GFP-URA3</i>                           | This study            |
| MA657       | <i>UPRE-GFP-URA3 ups1Δ</i>                     | W303       | a           | <i>ade2Δ1 leu2-3 his3Δ11, 15 trp1Δ1 ura3Δ1 can1Δ100 ura3Δ::4xUPRE-GFP-URA3 ups1Δ::hphNT1</i>             | This study            |
| AE47        | <i>IRE1(ΔIII) -3xHA-GFP</i>                    | S288c      | a           | <i>his3Δ1leu2Δ0 met15Δ0 lys2Δ0 ura3Δ0 IRE1::IRE1(ΔIII) -3xHA-GFP</i>                                     | Halbleib et al., 2017 |
| AE207       | <i>IRE1-3xHA-GFP(ΔIII) UPRE-GFP-URA3</i>       | S288c      | a           | <i>his3Δ1leu2Δ0 met15Δ0 lys2Δ0 ura3Δ0 IRE1::IRE1-3xHA-GFP(ΔIII) ura3Δ::4xUPRE-GFP-URA3</i>               | This study            |
| AE223       | <i>IRE1-3xHA-GFP(ΔIII) UPRE-GFP-URA3 ups1Δ</i> | S288c      | a           | <i>his3Δ1leu2Δ0 met15Δ0 lys2Δ0 ura3Δ0 IRE1::IRE1-3xHA-GFP(ΔIII) ura3Δ::4xUPRE-GFP-URA3 ups1Δ::hphNT1</i> | This study            |
| AE4         | wild-type +pRS315-IRE1                         | S288c      | a           | <i>his3Δ1leu2Δ0 met15Δ0 lys2Δ0 ura3Δ0 +pRS315-IRE1</i>                                                   | This study            |
| AE5         | <i>ups1Δ</i> +pRS315-IRE1                      | S288c      | α           | <i>his3Δ1leu2Δ0 ura3Δ0 Δups1::hphNT1 +pRS315-IRE1</i>                                                    | This study            |
| AE23        | wild-type +pRS315                              | S288c      | a           | <i>his3Δ1leu2Δ0 met15Δ0 lys2Δ0 ura3Δ0 +pRS315</i>                                                        | This study            |
| AE24        | <i>ups1Δ</i> +pRS315                           | S288c      | α           | <i>his3Δ1leu2Δ0 ura3Δ0 Δups1::hphNT1 +pRS315</i>                                                         | This study            |
| AE321       | <i>hac1Δ</i> +pRS315                           | S288c      | a           | <i>his3Δ1leu2Δ0 met15Δ0 lys2Δ0 ura3Δ0 hac1Δ::kanMX6 +pRS315</i>                                          | This study            |
| AE322       | <i>hac1Δ</i> +pRS315-IRE1                      | S288c      | a           | <i>his3Δ1leu2Δ0 met15Δ0 lys2Δ0 ura3Δ0 hac1Δ::kanMX6 +pRS315-IRE1</i>                                     | This study            |
| AE323       | <i>ups1Δ hac1Δ</i> +pRS315                     | S288c      | α           | <i>his3Δ1leu2Δ0 ura3Δ0 ups1Δ::hphNT1 hac1Δ::kanMX6 +pRS315</i>                                           | This study            |
| AE324       | <i>ups1Δ hac1Δ</i> +pRS315-IRE1                | S288c      | α           | <i>his3Δ1leu2Δ0 ura3Δ0 ups1Δ::hphNT1 hac1Δ::kanMX6 +pRS315-IRE1</i>                                      | This study            |
| AE326       | <i>ire1Δ</i> +pRS315-IRE1                      | S288c      | a           | <i>his3Δ1leu2Δ0 met15Δ0 lys2Δ0 ura3Δ0 ire1Δ::kanMX6 +pRS315-IRE1</i>                                     | This study            |
| AE75        | <i>UPRE-GFP-URA3</i> +pRS315                   | W303       | a           | <i>ade2Δ1 leu2Δ3 his3Δ11, 15 trp1Δ1 ura3Δ1 can1Δ100 ura3Δ::4xUPRE-GFP-URA3 +pRS315</i>                   | This study            |



|       |                                         |       |   |                                                                                                            |            |
|-------|-----------------------------------------|-------|---|------------------------------------------------------------------------------------------------------------|------------|
| AE76  | <i>UPRE-GFP-URA3 +pRS315-IRE1</i>       | W303  | a | <i>ade2Δ1 leu2Δ3 his3Δ11, 15 trp1Δ1 ura3Δ1 can1Δ100 ura3Δ::4xUPRE-GFP-URA3 +pRS315-IRE1</i>                | This study |
| AE77  | <i>UPRE-GFP-URA3 ups1Δ +pRS315</i>      | W303  | a | <i>ade2Δ1 leu2-3 his3Δ11, 15 trp1Δ1 ura3Δ1 can1Δ100 ura3Δ::4xUPRE-GFP-URA3 ups1Δ::hphNT1 +pRS315</i>       | This study |
| AE78  | <i>UPRE-GFP-URA3 ups1Δ +pRS315-IRE1</i> | W303  | a | <i>ade2Δ1 leu2-3 his3Δ11, 15 trp1Δ1 ura3Δ1 can1Δ100 ura3Δ::4xUPRE-GFP-URA3 ups1Δ::hphNT1 +pRS315-IRE1</i>  | This study |
| AE239 | <i>cho2Δ</i>                            | S288c | a | <i>his3Δ1leu2Δ0 met15Δ0 lys2Δ0 ura3Δ0 cho2Δ::hphNT1</i>                                                    | This study |
| AE240 | <i>ups1Δ cho2Δ</i>                      | S288c | α | <i>his3Δ1leu2Δ0 ura3Δ0 ups1Δ::hphNT1 cho2Δ::kanMX6</i>                                                     | This study |
| AE241 | <i>opi3Δ</i>                            | S288c | a | <i>his3Δ1leu2Δ0 met15Δ0 lys2Δ0 ura3Δ0 opi3Δ::hphNT1</i>                                                    | This study |
| AE243 | <i>ups1Δ opi3Δ</i>                      | S288c | α | <i>his3Δ1leu2Δ0 ura3Δ0 ups1Δ::hphNT1 opi3Δ::kanMX6</i>                                                     | This study |
| AE149 | <i>UPRE-GFP-URA3 cho2Δ</i>              | W303  | a | <i>ade2Δ1 leu2Δ3 his3Δ11, 15 trp1Δ1 ura3Δ1 can1Δ100 ura3Δ::4xUPRE-GFP-URA3 cho2Δ::kanMX6</i>               | This study |
| AE150 | <i>UPRE-GFP-URA3 ups1Δ cho2Δ</i>        | W303  | a | <i>ade2Δ1 leu2-3 his3Δ11, 15 trp1Δ1 ura3Δ1 can1Δ100 ura3Δ::4xUPRE-GFP-URA3 ups1Δ::hphNT1 cho2Δ::kanMX6</i> | This study |
| AE152 | <i>UPRE-GFP-URA3 opi3Δ</i>              | W303  | a | <i>ade2Δ1 leu2Δ3 his3Δ11, 15 trp1Δ1 ura3Δ1 can1Δ100 ura3Δ::4xUPRE-GFP-URA3 cho2Δ::kanMX6</i>               | This study |
| AE154 | <i>UPRE-GFP-URA3 ups1Δ opi3Δ</i>        | W303  | a | <i>ade2Δ1 leu2-3 his3Δ11, 15 trp1Δ1 ura3Δ1 can1Δ100 ura3Δ::4xUPRE-GFP-URA3 ups1Δ::hphNT1 opi3Δ::kanMX6</i> | This study |
| AE257 | <i>ire1Δ</i>                            | S288c | a | <i>his3Δ1leu2Δ0 met15Δ0 lys2Δ0 ura3Δ0 ire1Δ::kanMX6</i>                                                    | This study |
| AE258 | <i>ups1Δ ire1Δ</i>                      | S288c | α | <i>his3Δ1leu2Δ0 ura3Δ0 ups1Δ::hphNT1 ire1Δ::kanMX6</i>                                                     | This study |
| AE317 | <i>hac1Δ</i>                            | S288c | a | <i>his3Δ1leu2Δ0 met15Δ0 lys2Δ0 ura3Δ0 hac1Δ::kanMX6</i>                                                    | This study |
| AE319 | <i>ups1Δ hac1Δ</i>                      | S288c | α | <i>his3Δ1leu2Δ0 ura3Δ0 ups1Δ::hphNT1 hac1Δ::kanMX6</i>                                                     | This study |
| AE335 | <i>SCH9-6HA</i>                         | S288c | a | <i>his3Δ1leu2Δ0 met15Δ0 lys2Δ0 ura3Δ0 SCH9-6HA::natNT2</i>                                                 | This study |
| AE337 | <i>ups1Δ SCH9-6HA</i>                   | S288c | α | <i>his3Δ1leu2Δ0 ura3Δ0 ups1Δ::hphNT1 SCH9-6HA::natNT2</i>                                                  | This study |
| AE344 | <i>npr2Δ</i>                            | S288c | a | <i>his3Δ1leu2Δ0 met15Δ0 lys2Δ0 ura3Δ0 npr2Δ::natNT2</i>                                                    | This study |

|       |                                                                            |       |   |                                                                                                                                              |            |
|-------|----------------------------------------------------------------------------|-------|---|----------------------------------------------------------------------------------------------------------------------------------------------|------------|
| AE346 | <i>ups1Δ npr2Δ</i>                                                         | S288c | α | <i>his3Δ1leu2Δ0 ura3Δ0 ups1Δ::hphNT1 npr2Δ::natNT2</i>                                                                                       | This study |
| AE348 | <i>npr3Δ</i>                                                               | S288c | a | <i>his3Δ1leu2Δ0 met15Δ0 lys2Δ0 ura3Δ0 npr3Δ::natNT2</i>                                                                                      | This study |
| AE349 | <i>ups1Δ npr3Δ</i>                                                         | S288c | α | <i>his3Δ1leu2Δ0 ura3Δ0 ups1Δ::hphNT1 npr3Δ::natNT2</i>                                                                                       | This study |
| AE363 | wild-type +pRS416                                                          | S288c | a | <i>his3Δ1leu2Δ0 met15Δ0 lys2Δ0 ura3Δ0 +pRS416</i>                                                                                            | This study |
| AE364 | wild-type +pRS416-SCH9                                                     | S288c | a | <i>his3Δ1leu2Δ0 met15Δ0 lys2Δ0 ura3Δ0 +pRS416-SCH9</i>                                                                                       | This study |
| AE365 | wild-type +pRS416-SCH9(T723A, S726A, T737A, S758A, S765A)                  | S288c | a | <i>his3Δ1leu2Δ0 met15Δ0 lys2Δ0 ura3Δ0 +pRS416-SCH9(T723A, S726A, T737A, S758A, S765A)</i>                                                    | This study |
| AE366 | wild-type +pRS416-SCH9(T723D, S726D, T737E, S758E, S765E)                  | S288c | a | <i>his3Δ1leu2Δ0 met15Δ0 lys2Δ0 ura3Δ0 +pRS416-SCH9(T723D, S726D, T737E, S758E, S765E)</i>                                                    | This study |
| AE367 | <i>ups1Δ</i> +pRS416                                                       | S288c | α | <i>his3Δ1leu2Δ0 ura3Δ0 ups1Δ::hphNT1 +pRS416</i>                                                                                             | This study |
| AE368 | <i>ups1Δ</i> +pRS416-SCH9                                                  | S288c | α | <i>his3Δ1leu2Δ0 ura3Δ0 ups1Δ::hphNT1 +pRS416-SCH9</i>                                                                                        | This study |
| AE369 | <i>ups1Δ</i> +pRS416-SCH9(T723A, S726A, T737A, S758A, S765A)               | S288c | α | <i>his3Δ1leu2Δ0 ura3Δ0 ups1Δ::hphNT1 +pRS416-SCH9(T723A, S726A, T737A, S758A, S765A)</i>                                                     | This study |
| AE370 | <i>ups1Δ</i> +pRS416-SCH9(T723D, S726D, T737E, S758E, S765E)               | S288c | α | <i>his3Δ1leu2Δ0 ura3Δ0 ups1Δ::hphNT1 +pRS416-SCH9(T723D, S726D, T737E, S758E, S765E)</i>                                                     | This study |
| AE399 | <i>UPRE-GFP-URA3</i> +pRS416                                               | W303  | a | <i>ade2Δ1 leu2Δ3 his3Δ11, 15 trp1Δ1 ura3Δ1 can1Δ100 ura3Δ::4xUPRE-GFP-URA3 +pRS416</i>                                                       | This study |
| AE403 | <i>UPRE-GFP-URA3 ups1Δ</i> +pRS416                                         | W303  | a | <i>ade2Δ1 leu2Δ3 his3Δ11, 15 trp1Δ1 ura3Δ1 can1Δ100 ura3Δ::4xUPRE-GFP-URA3 ups1Δ::hphNT1+pRS416</i>                                          | This study |
| AE404 | <i>UPRE-GFP-URA3 ups1Δ</i> +pRS416-SCH9                                    | W303  | a | <i>ade2Δ1 leu2Δ3 his3Δ11, 15 trp1Δ1 ura3Δ1 can1Δ100 ura3Δ::4xUPRE-GFP-URA3 ups1Δ::hphNT1+pRS416-SCH9</i>                                     | This study |
| AE405 | <i>UPRE-GFP-URA3 ups1Δ</i> +pRS416-SCH9(T723A, S726A, T737A, S758A, S765A) | W303  | a | <i>ade2Δ1 leu2Δ3 his3Δ11, 15 trp1Δ1 ura3Δ1 can1Δ100 ura3Δ::4xUPRE-GFP-URA3 ups1Δ::hphNT1 +pRS416-SCH9(T723A, S726A, T737A, S758A, S765A)</i> | This study |
| AE406 | <i>UPRE-GFP-URA3 ups1Δ</i> +pRS416-SCH9(T723D, S726D, T737E, S758E, S765E) | W303  | a | <i>ade2Δ1 leu2Δ3 his3Δ11, 15 trp1Δ1 ura3Δ1 can1Δ100 ura3Δ::4xUPRE-GFP-URA3 ups1Δ::hphNT1 +pRS416-SCH9(T723D, S726D, T737E, S758E, S765E)</i> | This study |
| AE352 | <i>ups2Δ SCH9-6HA</i>                                                      | S288c | a | <i>his3Δ1leu2Δ0 ura3Δ0 ups2Δ::natNT2 SCH9-6HA::hphNT1</i>                                                                                    | This study |
| AE354 | <i>crd1Δ SCH9-6HA</i>                                                      | S288c | a | <i>his3Δ1leu2Δ0 ura3Δ0 crd1Δ::kanMX6 SCH9-6HA::natNT2</i>                                                                                    | This study |

|       |                             |       |   |                                                                                                      |            |
|-------|-----------------------------|-------|---|------------------------------------------------------------------------------------------------------|------------|
| AE359 | <i>nem1Δ SCH9-6HA</i>       | S288c | a | <i>his3Δ1leu2Δ0 ura3Δ0 nem1Δ::hphNT1<br/>SCH9-6HA::natNT2</i>                                        | This study |
| AE360 | <i>spo7Δ SCH9-6HA</i>       | S288c | a | <i>his3Δ1leu2Δ0 ura3Δ0 spo7Δ::hphNT1 SCH9-<br/>6HA::natNT2</i>                                       | This study |
| AE103 | <i>UPRE-GFP-URA3 tam41Δ</i> | W303  | a | <i>ade2Δ1 leu2-3 his3Δ11,15 trp1Δ1 ura3Δ1<br/>can1Δ100 ura3Δ::4xUPRE-GFP-URA3<br/>tam41Δ::kanMX6</i> | This study |
| AE105 | <i>UPRE-GFP-URA3 pgs1Δ</i>  | W303  | a | <i>ade2Δ1 leu2-3 his3Δ11,15 trp1Δ1 ura3Δ1<br/>can1Δ100 ura3Δ::4xUPRE-GFP-URA3<br/>tam41Δ::kanMX6</i> | This study |
| AE316 | <i>UPRE-GFP-URA3 crd1Δ</i>  | W303  | a | <i>ade2Δ1 leu2Δ3 his3Δ11, 15 trp1Δ1 ura3Δ1<br/>can1Δ100 ura3Δ::4xUPRE-GFP-URA3<br/>crd1Δ::kanMX6</i> | This study |

---

Osman, C., Haag, M., Potting, C., Rodenfels, J., Dip, P. V., Wieland, F. T., Brugger, B., Westermann, B., and Langer, T. (2009) The genetic interactome of prohibitins: coordinated control of cardiolipin and phosphatidylethanolamine by conserved regulators in mitochondria. *J Cell Biol* 184, 583-596

Halbleib, K., Pesek, K., Covino, R., Hofbauer, H. F., Wunnicke, D., Hanelt, I., Hummer, G., and Ernst, R. (2017) Activation of the Unfolded Protein Response by Lipid Bilayer Stress. *Mol Cell* 67, 673-684 e678

Table S6. Plasmid list

| name                                              | source                 |
|---------------------------------------------------|------------------------|
| pRS315                                            | Sikorsk et al., 1989   |
| pRS315-IRE1                                       | Velázquez et al., 2016 |
| pRS416                                            | Sikorsk et al., 1989   |
| pRS416-SCH9                                       | Urban et al., 2007     |
| pRS416-SCH9(T723A, S726A, T737A,<br>S758A, S765A) | Urban et al., 2007     |
| pES416-SCH9(T723D, S726D, T737E, S758E,<br>S765E) | Urban et al., 2007     |

Sikorski, R. S., and Hieter, P. (1989) A system of shuttle vectors and yeast host strains designed for efficient manipulation of DNA in *Saccharomyces cerevisiae*. *Genetics* 122, 19-27

Velázquez, A. P., Tatsuta, T., Ghillebert, R., Drescher, I., and Graef, M. (2016) Lipid droplet-mediated ER homeostasis regulates autophagy and cell survival during starvation. *J Cell Biol* 212, 621-631

Urban, J., Soulard, A., Huber, A., Lippman, S., Mukhopadhyay, D., Deloche, O., Wanke, V., Anrather, D., Ammerer, G., Riezman, H., Broach, J. R., De Virgilio, C., Hall, M. N., and Loewith, R. (2007) Sch9 is a major target of TORC1 in *Saccharomyces cerevisiae*. *Mol Cell* 26, 663-674
